# Supplementary material for: Comprehensive profiling of metaplastic breast carcinomas reveals frequent overexpression of programmed death-ligand 1
Source: PubMed Central journal article supplement — J Clin Pathol. 2016 Aug 16;70(3):255–9. doi: 10.1136/jclinpath-2016-203874 (PMC5339564; doi:10.1136/jclinpath-2016-203874), 2016-08-16
Supplement: jclinpath-2016-203874supp.pdf [file jclinpath-2016-203874supp.pdf]

Supplementary Figure:

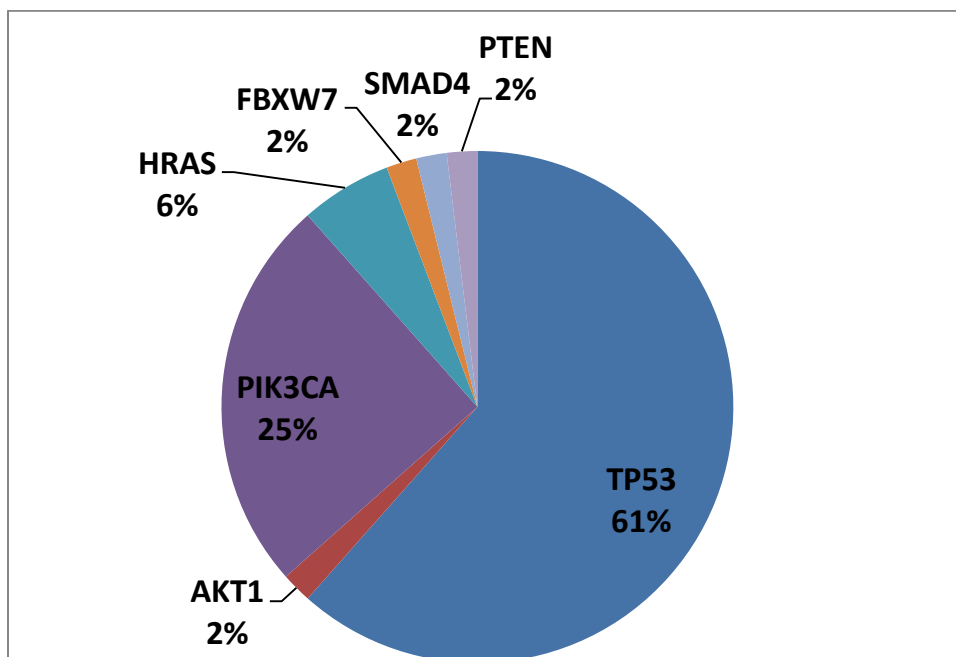

**Figure S1:** Proportions of different pathogenic genetic alterations detected in MBCs using Illumina TruSeq amplicon cancer hotspot panel (total number of pathogenic alterations identified= 52, denominator).

\**BRCA1* mutations are not included.

**Supplementary Tables:**

| Patient # | ALTERATIONS SEEN IN MBC CASES AND THEIR CLINICAL SIGNIFICANCE       |                                                                               |
|-----------|---------------------------------------------------------------------|-------------------------------------------------------------------------------|
| 1         | <i>TP53</i> (I195T)                                                 | pathogenic/presumed pathogenic                                                |
| 2         | <i>TP53</i> (C242fs); <i>AKT1</i> (E17K)                            | pathogenic/presumed pathogenic; pathogenic/presumed pathogenic                |
| 3         | <i>TP53</i> (S241C)                                                 | pathogenic/presumed pathogenic                                                |
| 4         | <i>TP53</i> (E198X); <i>PIK3CA</i> (K1111del)                       | pathogenic/presumed pathogenic; pathogenic/presumed pathogenic                |
| 5         | <i>TP53</i> (R248Q)                                                 | pathogenic/presumed pathogenic                                                |
| 6         | <i>TP53</i> (R282W); <i>STK11</i> (F354L)                           | pathogenic/presumed pathogenic; likely benign                                 |
| 7         | <i>PIK3CA</i> (H1047R); <i>HRAS</i> (Q61L); <i>APC</i> (I1307K glm) | pathogenic/presumed pathogenic; pathogenic/presumed pathogenic; other         |
| 8         | <i>TP53</i> (V216M)                                                 | pathogenic/presumed pathogenic                                                |
| 9         | <i>FBXW7</i> (Q508X)                                                | pathogenic/presumed pathogenic                                                |
| 10        | <i>TP53</i> (S241C)                                                 | pathogenic/presumed pathogenic                                                |
| 11        | <i>c-KIT*</i> (T67S); <i>TP53</i> (R248W); <i>SMAD4</i> (D415fs)    | likely benign; pathogenic/presumed pathogenic; pathogenic/presumed pathogenic |
| 12        | <i>TP53</i> (C242X)                                                 | pathogenic/presumed pathogenic                                                |
| 13        | <i>HRAS</i> (Q61L)                                                  | pathogenic/presumed pathogenic                                                |
| 14        | <i>TP53</i> (D281E)                                                 | pathogenic/presumed pathogenic                                                |
| 15        | <i>TP53</i> (Y163C)                                                 | pathogenic/presumed pathogenic                                                |
| 16        | <i>PIK3CA</i> (H1047L)                                              | pathogenic/presumed pathogenic                                                |
| 17        | <i>TP53</i> (S106R); <i>PIK3CA</i> (H1047R); <i>MLH1</i> (S406N)    | pathogenic/presumed pathogenic; pathogenic/presumed pathogenic; likely benign |
| 18        | <i>PIK3CA</i> (H1047L)                                              | pathogenic/presumed pathogenic                                                |
| 19        | <i>TP53</i> (G244S)                                                 | pathogenic/presumed pathogenic                                                |
| 20        | <i>cMET</i> (T1010I)                                                | likely benign                                                                 |
| 21        | <i>TP53</i> (V173M); <i>HRAS</i> (L52R)                             | pathogenic/presumed pathogenic; variant of unknown significance               |
| 22        | <i>PTEN</i> (R233X); <i>PIK3CA</i> (H1047R)                         | pathogenic/presumed pathogenic; pathogenic/presumed pathogenic                |
| 23        | <i>HRAS</i> (G13V); <i>BRAF</i> (N581I)                             | pathogenic/presumed pathogenic; variant of unknown significance               |
| 24        | <i>PIK3CA</i> (H1047R)                                              | pathogenic/presumed pathogenic                                                |
| 25        | <i>TP53</i> (R273H)                                                 | pathogenic/presumed pathogenic                                                |
| 26        | <i>TP53</i> (R33fs); <i>JAK3</i> (V722I)                            | pathogenic/presumed pathogenic; variant of unknown significance               |
| 27        | <i>TP53</i> (R273C); <i>FBXW7</i> (T463S)                           | pathogenic/presumed pathogenic; variant of unknown significance               |
| 28        | <i>TP53</i> (R213X)                                                 | pathogenic/presumed pathogenic                                                |
| 29        | <i>PIK3CA</i> (H1047R)                                              | pathogenic/presumed pathogenic                                                |
| 30        | <i>PIK3CA</i> (N345K)                                               | pathogenic/presumed pathogenic                                                |
| 31        | <i>TP53</i> (C242fs)                                                | pathogenic/presumed pathogenic                                                |
| 32        | <i>TP53</i> (I195T)                                                 | pathogenic/presumed pathogenic                                                |
| 33        | <i>TP53</i> (R110fs)                                                | pathogenic/presumed pathogenic                                                |
| 34        | <i>TP53</i> (Q165X)                                                 | pathogenic/presumed pathogenic                                                |
| 35        | <i>TP53</i> (C242fs); <i>JAK3</i> (V722I)                           | pathogenic/presumed pathogenic; variant of unknown significance               |

|    |                                                                                                                                                      |                                                                |
|----|------------------------------------------------------------------------------------------------------------------------------------------------------|----------------------------------------------------------------|
| 36 | <i>TP53</i> (R273C)                                                                                                                                  | pathogenic/presumed pathogenic                                 |
| 37 | <i>TP53</i> (C242X)                                                                                                                                  | pathogenic/presumed pathogenic                                 |
| 38 | <i>PIK3CA</i> (H1047R)                                                                                                                               | pathogenic/presumed pathogenic                                 |
| 39 | <i>TP53</i> (Y220C); <i>cMET</i> (T1010I)                                                                                                            | pathogenic/presumed pathogenic; likely benign                  |
| 40 | <i>PIK3CA</i> (H1047R)                                                                                                                               | pathogenic/presumed pathogenic                                 |
| 41 | <i>STK11</i> (F354L)                                                                                                                                 | likely benign                                                  |
| 42 | <i>TP53</i> (R175H)                                                                                                                                  | pathogenic/presumed pathogenic                                 |
| 43 | <i>TP53</i> (C238Y); <i>PIK3CA</i> (H1047R)                                                                                                          | pathogenic/presumed pathogenic; pathogenic/presumed pathogenic |
| 44 | <i>TP53</i> (C176F)                                                                                                                                  | pathogenic/presumed pathogenic                                 |
| 45 | <i>STK11</i> (F354L)                                                                                                                                 | likely benign                                                  |
| 46 | <i>PIK3CA</i> (P539R); <i>RET</i> (Y719F)                                                                                                            | pathogenic/presumed pathogenic; likely benign                  |
| 47 | <i>TP53</i> (V274F); <i>PTEN</i> (K13E & R15fs)                                                                                                      | pathogenic/presumed pathogenic; pathogenic/presumed pathogenic |
| 48 | <i>TP53</i> (R273H)                                                                                                                                  | pathogenic/presumed pathogenic                                 |
|    | *other- mild mutation that is a common germline variant in the Ashkenazi Jewish population. Carriers have a slightly increased risk of colon cancer. |                                                                |
|    | The row highlighted in yellow shows patients with non-pathogenic mutations and were not counted during the discussion                                |                                                                |

**Table S1:** Specific alterations in genes and their clinical significance in all interpretable cases of MBCs.

| PATHOGENIC ALTERATIONS IN MBCS |           |
|--------------------------------|-----------|
| Altered pathogenic gene        | Frequency |
| <i>TP53</i>                    | 32        |
| <i>AKT1</i>                    | 1         |
| <i>Wild Type</i>               | 9         |
| <i>PIK3CA</i>                  | 13        |
| <i>HRAS</i>                    | 3         |
| <i>FBXW7</i>                   | 1         |
| <i>SMAD4</i>                   | 1         |
| <i>PTEN</i>                    | 1         |
| Total number of mutations      | 52        |
|                                |           |

**Table S2:** Pathogenic/presumed alterations and frequency seen in MBCs.

| <b>PATHOGENIC ALTERATIONS IN TNBCs</b>             |           |
|----------------------------------------------------|-----------|
| Total number of patients with pathogenic mutations | 94        |
| Altered gene                                       | Frequency |
| <i>TP53</i>                                        | 83        |
| <i>PIK3CA</i>                                      | 13        |
| <i>AKT1</i>                                        | 4         |
| <i>STK11</i>                                       | 2         |
| <i>BRCA1</i>                                       | 4         |
| <i>BRCA2</i>                                       | 3         |
| <i>HRAS</i>                                        | 1         |
| <i>KRAS</i>                                        | 1         |
| <i>APC</i>                                         | 2         |
| <i>FGFR2</i>                                       | 2         |
| <i>FGFR3</i>                                       | 1         |
| <i>MAPK1</i>                                       | 1         |
| <i>PTEN</i>                                        | 1         |
| <i>ERBB2</i>                                       | 3         |
| <i>ERBB3</i>                                       | 1         |
| <i>CDKN2A</i>                                      | 1         |
| <i>KDR</i>                                         | 1         |
| <i>ABL1</i>                                        | 1         |
| <i>DDR2</i>                                        | 1         |
| <i>ARAF</i>                                        | 1         |
| <i>FGF10</i>                                       | 1         |
| <i>CCNE1</i>                                       | 1         |
| <i>MCL1</i>                                        | 1         |
| Total number of mutations                          | 130       |

**Table S3:** Pathogenic alterations and their frequency in TNBCs.

| <b>PATHOGENIC ALTERATIONS IN HORMONE POSITIVE (HER2/NEU NEGATIVE) BREAST CANCERS</b> |           |
|--------------------------------------------------------------------------------------|-----------|
| Total number of patients with pathogenic mutations                                   | 58        |
| Altered gene                                                                         | Frequency |
| <i>BRCA2</i>                                                                         | 2         |
| <i>BRCA1</i>                                                                         | 4         |
| <i>ERBB2</i>                                                                         | 3         |
| <i>CDH1</i>                                                                          | 1         |
| <i>TP53</i>                                                                          | 25        |
| <i>PIK3CA</i>                                                                        | 34        |
| <i>SMAD4</i>                                                                         | 1         |
| <i>AKT1</i>                                                                          | 4         |
| <i>PTEN</i>                                                                          | 3         |
| <i>MYC</i>                                                                           | 1         |
| <i>ATM</i>                                                                           | 1         |
| <i>APC</i>                                                                           | 1         |
| Total number of mutations                                                            | 80        |

**Table S4:** Pathogenic alterations and their frequency in Luminal breast cancer cases.

| <b>PATHOGENIC ALTERATIONS IN HER2 POSITIVE BREAST CANCERS</b> |           |
|---------------------------------------------------------------|-----------|
| Total number of patients with pathogenic mutations            | 20        |
| Altered gene                                                  | Frequency |
| <i>TP53</i>                                                   | 18        |
| <i>PIK3CA</i>                                                 | 11        |
| <i>PTEN</i>                                                   | 1         |
| <i>ERBB2</i>                                                  | 1         |
| Total number of mutations                                     | 32        |

**Table S5:** Pathogenic alterations and their frequency in HER2+ breast cancer cases.

| Subtype |                                   | Next Generation Sequencing |                 | Total |
|---------|-----------------------------------|----------------------------|-----------------|-------|
|         |                                   | <i>TP53</i> mutation       | other mutations |       |
|         | Metaplastic carcinoma             | 32 (71%)                   | 16 (29%)        | 45    |
|         | TNBC NOS                          | 83 (88%)                   | 11 (12%)        | 94    |
|         | HER2+                             | 18 (95%)                   | 2 (5%)          | 20    |
|         | Hormone positive breast carcinoma | 25 (43%)                   | 33 (57%)        | 58    |
| Total   |                                   | 159 (73%)                  | 61 (28%)        | 217   |

**Table S6:** Cases with pathogenic *TP53* mutation versus pathogenic mutations in other genes.
